1 **Low photosynthetic rate under low light stress inhibited sucrose distribution and transportation to grain**

2 Zhichao Sun, Wenjie Geng, Baizhao Ren, Bin Zhao, Peng Liu, Jiwang Zhang\*

3 State Key Laboratory of Crop Biology, Shandong Agricultural University, Taian 271018, Shandong, China.

4 \*Correspondence Jiwang Zhang: [jwzhang@sdau.edu.cn](mailto:jwzhang@sdau.edu.cn)

5 **Highlight**

6 The key factor of low light stress reducing summer maize yield was the decrease of leaf photosynthetic rate,  
7 resulting in insufficient grain dry matter supply. The sugar concentration gradient between leaves and grains  
8 further restricted the sucrose transport from leaves to grains.

9 **Abstract**

10 Under the condition of low light, the yield of summer maize decreased significantly, but the decrease of yield  
11 under low light stress was not only caused by the lack of photosynthetic assimilates in leaves, but also the  
12 transportation and utilization of assimilates by stems and grains. In this study, we investigated the effects of low  
13 light stress on leaves, stems and grains of summer maize and the relationship between them. The results showed  
14 that the synthesis ability of sucrose and export sucrose to grains ability in leaves decreased under low light. Due to  
15 dry matter transfer, the number and area of small vascular bundles in spike node and shank decreased, which  
16 restricted the translocation of photoassimilates to grains at filling stage. The activities of SUS and AGPase was  
17 decreased in grains under low light stress, which limited the availability of sucrose. The process of leaf synthesis,  
18 sucrose loading and sucrose utilization in grains was affected under low light, resulting in relatively higher sucrose  
19 concentration in grains than in leaves, forming a “leaf low” - “grain high” sugar concentration gradient, resulting  
20 in the opposite hydrostatic pressure, and then feedback inhibition of sucrose output in leaves, reducing sucrose  
21 loading and transportation rate.

22 **Key words:** low light stress; phloem loading; photosynthesis; source-sink relationship; sucrose transport; maize

23 **Introduction**

24 It was expected that by 2050, the global population would reach 9 billion (Godfray *et al.*, 2010) and the Novel  
25 Coronavirus pandemic (Lamichhane and Reay-Jones, 2021) would pose a severe challenge to global food supply  
26 and food security. As one of the most important crops in the world, maize is an important source of food and feed  
27 for human beings. However, in recent years, environmental pollution has increased and extreme weather has  
28 occurred frequently, resulting in a significant reduction in the total solar radiation and effective sunshine hours in  
29 China (Ramanathan and Feng, 2009; Shao *et al.*, 2021; Yang *et al.*, 2021). Insufficient light during the growth  
30 period of summer maize resulted in a significant decrease in yield (Zhang *et al.*, 2006). Therefore, it is necessary to  
31 clarify the mechanism of low light affecting maize yield formation and provide coping strategies for future climate  
32 change.

33 The main source of grain yield was photoassimilates formed after silking (Shi *et al.*, 2015). The expression of  
34 PEPC related genes was susceptible to light intensity (Chollet *et al.*, 1996), and the activation of Rubisco was  
35 limited by light-dependent adenosine triphosphate (ATP) (Wu *et al.*, 2014). Under low light conditions, the  
36 activities of photosynthetic enzymes such as phosphoenolpyruvate carboxylase (PEPC), ribulose biphosphate  
37 carboxylase oxygenase (Rubisco) and NADP- dependent malic enzyme (NADP-ME) was decreased significantly  
38 (Zhang *et al.*, 2007 ; Sharwood *et al.*, 2014), photoassimilates accumulation decreased. The triose phosphate  
39 produced during the Calvin cycle has three places, one was involved in the regeneration of ribulose diphosphate,  
40 the second was the synthesis of starch in the chloroplast by adenosine diphosphate glucose pyrophosphorylase  
41 (AGPase) and other enzymes, and the third was transported to the cytoplasm through the triose phosphate  
42 translocator (TPT), sucrose phosphate synthase (SPS) and other enzymes to synthesize sucrose and then  
43 transported to the grain. The output rate of triose phosphate to the cytoplasm determines the synthesis and output  
44 rate of sucrose, but it is difficult to determine the output rate due to the limited technology at present. Therefore,

45 the activity of enzymes was used to determine the location of triose phosphate. The changes of enzyme activities  
46 such as AGPase and SPS are still unknown under low light conditions. Grain filling substances mainly came from  
47 two aspects, one was the transformation of storage substances in organs such as stems, and the other was the  
48 accumulation of photoassimilate after flowering, of which the second aspect accounted for 70-90%. Lack of light  
49 led to insufficient production of dry matter, and grains were required to transport more nutrients from vegetative  
50 organs. The transport of assimilates in vegetative organs before silking increased (Wang *et al.*, 2020; Yang *et al.*,  
51 2021). However, the effect of increased dry matter transport in stem on long-distance transport of photoassimilates  
52 after flowering is unknown.

53 The transportation of carbohydrates in plants from “source” tissue to “sink” tissue mainly included three  
54 stages. The loading of phloem in “source” tissue was the starting point of long-distance transportation of nutrients  
55 (Zhang *et al.*, 2015). Previous studies have shown that maize leaves use apoplast transport based on ultrastructural,  
56 physiological and genetic data (Bezruczyk *et al.*, 2021). Sucrose was first synthesized in the cytoplasm of  
57 mesophyll cells (MS) and moved from MS to phloem parenchyma cells (PP) via plasmodesmata (Braun, 2022). It  
58 was then excreted by sucrose transporters (ZmSWEET13a, ZmSWEET13b, and ZmSWEET13c) (Bezruczyk *et al.*,  
59 2018) and entered the companion cell (CC)-sieve element (SE) complex (Slewinski *et al.*, 2009) via SUT1.  
60 Then it was transported to grains in SE (Braun, 2022). Previous studies found that stress changed the  
61 photoassimilate transport rate by altering the phloem loading process. After low temperature stress, the expression  
62 level of maize genes involved in plasmodesmata operation changed significantly (Bilska-Kos *et al.*, 2016). Low  
63 light inhibited the growth of SE and CC in nectarine phloem tissue, and the density of plasmodesmata decreased or  
64 even did not exist (Wang and Huang, 2003). The expression of SUT1 in different parts was changed under  
65 different degrees of low light stress (Ishibashi *et al.*, 2014). At present, there are few reports about the effect of low  
66 light on phloem loading of summer maize leaves.

67 The pressure flow model has been widely accepted to explain sucrose transport dynamics (Patrick, 2013).  
68 After sucrose accumulates to a high concentration in SEs of leaf, water flows into the SEs from xylem (X) through  
69 infiltration to produce relatively high hydrostatic pressure. In grains, sucrose was unloaded from the phloem,  
70 resulting in the diffusion of water into surrounding cells and subsequent reduction of hydrostatic pressure. Under  
71 low light conditions, the photosynthetic rate of leaves decreased. What sugar concentration gradient will result  
72 from the competition between leaves and grains for limited sucrose? Does the difference in sugar concentration  
73 between leaves and grains affect phloem transport dynamics? These are questions for further exploration. Studies  
74 by Chen *et al.* (2011) showed that *AtSWEET13* guaranteed the high efflux rate of Arabidopsis at low  
75 photoassimilation rate under low light conditions. Does summer maize have an adaptive mechanism to ensure the  
76 balance of sucrose efflux and absorption between PP and CC-SE under low light?

77 Therefore, this experiment simulated low light stress by artificial shading to clarify (1) how maize coordinates  
78 the distribution of Calvin cycle products between leaves and grains; (2) the effects of low light on loading process  
79 of sucrose phloem; (3) the effects of sucrose concentration gradient formed between leaves and grains on sucrose  
80 output in leaves; (4) Whether the pre-flowering dry matter transport increased and the effect of increased transport  
81 on long-distance sucrose transport in the late stage; (5) the performance of summer maize to adapt to low light  
82 stress, to provide theoretical basis for the stress-resistant and high-yield cultivation technology of summer maize.

## 83 **Materials and methods**

### 84 **Experimental procedures**

85 The experiment was conducted at the State Key Laboratory of Crop Biology and the Experimental Farm of  
86 Shandong Agricultural University (36°17'N, 117°17'E) in 2020-2021. The soil type was brown loam, and the basic  
87 fertility of 0-20 cm soil before sowing was as follows: soil organic matter 9.2 g kg<sup>-1</sup>, total nitrogen 0.7 g kg<sup>-1</sup>, total  
88 phosphorus 0.8 g kg<sup>-1</sup>, available nitrogen 78.7 mg kg<sup>-1</sup>, available phosphorus 35.6mg kg<sup>-1</sup>, available potassium 84.5

89 mg kg<sup>-1</sup>. Summer maize hybrid Denghai 605(DH605) was selected as experimental material, and the planting  
90 density was 67, 500 ha<sup>-1</sup> plants. Two experimental treatments, S (shading from flowering to maturity stage) and  
91 CK (natural light control), were set under field conditions, and shading was 60% (simulated cloudy day), which  
92 was achieved by scaffolding and black nylon net (Jia Wan Ying Trading Co., Ltd, Linyi City, China) with light  
93 transmission rate of 40%. A distance of 2 m was kept between the shading net and the maize canopy to ensure that  
94 the field microclimate in the shading shed was basically consistent with the control conditions. The plot area was  
95 27 m<sup>2</sup> (9 m×3 m) and 3 replicates were set. Sowing on June 8th, irrigation method was sprinkler irrigation,  
96 spraying acetochlor (20 %) and atrazine (20 %) to control weeds before emergence, spraying difenoconazole  
97 (10 %) to control rust and brown spot. At the 6-leaf stage (V6), 750 kg ha<sup>-1</sup> compound fertilizer (N: P<sub>2</sub>O<sub>5</sub>: K<sub>2</sub>O=  
98 28:6:6) was applied.

#### 99 **Field microclimate**

100 At tasseling stage (VT), the light intensity at the top, ear and bottom of maize was measured by digital  
101 illuminometer (TES-1332A, TES Co. Ltd, Taiwan, China), the CO<sub>2</sub> concentration at ear was measured by CIRAS-  
102 III (PP System, Hansatech, USA), temperature and humidity recorder (GSP-6, Elitech Co. Ltd, Jiangsu, China)  
103 measured the temperature and humidity of ear, used soil temperature and humidity recorder (SY-HWS, Yashi, Co.  
104 Ltd, Hebei, China) to measure the temperature and humidity of soil, and used portable weather instrument  
105 (NK-5500, KESTREL Instruments Co. Ltd, USA) to measure the wind speed of ear. Five replicates were measured  
106 for each treatment, and the above indicators were measured at 11:00 (Table 1) (Gao *et al.*, 2017).

#### 107 **Yield**

108 Thirty ears were harvested continuously in 3 rows in the middle of each plot and used to measure yield after  
109 natural drying (converted to 14% water content) (Shi *et al.*, 2015). The number of harvested ears was the number  
110 of effective ears for field investigation. The formula for calculating yield was:

111 Yield (kg ha<sup>-1</sup>) = number of ears (ha<sup>-1</sup>) × number of grains per ear × 1000-grain weight (g) / 10<sup>6</sup> × (1- water  
112 content %) / (1-14%)

#### 113 **Dry matter accumulation and distribution**

114 At VT stage and physiological maturity stage (R6), 5 representative plants with the same growth status were  
115 selected from each plot and divided into stems, leaves (VT) or stems, leaves and ears (R6). The plants were placed  
116 in the oven (DHG-9420A, Bilon Instruments Co. Ltd, Shanghai, China) at 110 °C for degreening and dried at  
117 80 °C until constant weight weighing. Dry matter weight in stem (DW<sub>S</sub>), dry matter weight in leaf (DW<sub>L</sub>), dry  
118 matter weight in grain (DW<sub>G</sub>), proportion of dry matter in stem (DWP<sub>S</sub>), proportion of dry matter in leaf (DWP<sub>L</sub>),  
119 proportion of dry matter in grain (DWP<sub>G</sub>) and other indicators representing the accumulation and distribution of  
120 dry matter were calculated by the following formula (Yang *et al.*, 2021).

121 Dry matter proportion of each organ (%) = dry weight of vegetative organ (g plant<sup>-1</sup>) / total dry weight of plant (g  
122 plant<sup>-1</sup>) × 100;

123 Dry matter translocation of pre-flowering (g plant<sup>-1</sup>) (TBA) = dry matter accumulation at flowering (g plant<sup>-1</sup>)  
124 –dry matter accumulation of vegetative organs at maturity (g plant<sup>-1</sup>);

125 Dry matter transport rate of pre-flowering (%) (TRBA) = TBA (g plant<sup>-1</sup>) / dry matter accumulation in shoot at  
126 flowering (g plant<sup>-1</sup>) × 100;

127 Contribution rate of pre-flowering dry matter to grain (%) (TFGR) = TBA (g plant<sup>-1</sup>) / kernel dry matter weight at  
128 maturity (g plant<sup>-1</sup>) × 100;

129 The amount of assimilated dry matter after flowering (g plant<sup>-1</sup>) (PAA) = dry matter accumulation in shoot at  
130 maturity (g plant<sup>-1</sup>) – dry matter accumulation in shoot at flowering (g plant<sup>-1</sup>) = kernel dry matter weight at  
131 maturity (g plant<sup>-1</sup>) – TBA (g plant<sup>-1</sup>);

132 Contribution rate of dry matter assimilation to grain after flowering (%) (PAGR) = PAA (g plant<sup>-1</sup>) / kernel dry

133 matter weight at maturity ( $\text{g plant}^{-1}$ )  $\times 100$ .

#### 134 **Gas exchange measurements**

135 At R3 stage, 10 representative plants with the same growth status were selected for each treatment, and gas  
136 exchange parameters such as net photosynthetic rate (Pn), stomatal conductance (Gs), intercellular carbon dioxide  
137 concentration (Ci) and transpiration rate (E) were measured by CIRAS-III from 9: 00 to 11: 00 (Huang *et al.*,  
138 2020).

#### 139 **Observation of Kranz anatomy and determination of plasmodesmata densities**

140 At R3 stage, the ear leaves of 3 representative plants with consistent growth were selected. A square leaf  
141 (0.5cm  $\times$  0.5cm) was taken from the middle of the leaf (avoiding veins) and fixed with 2.5% glutaraldehyde  
142 fixative solution. Air was pumped until the cut pieces settled and fixed at 4 °C for 24 h. The material was washed  
143 with PBS buffer for 5 times, 20 min each, and then transferred to OsO<sub>4</sub> for 4.5h fixation. The leaf tissues were then  
144 washed with PBS buffer for 5 times, dehydrated with conventional gradient ethanol, replaced with epoxy propane  
145 and embedded with resin, and polymerized for 3 days at different temperatures. After treatment, the leaf tissues  
146 were sectionalized with LKB-5 ultrafine microtome, stained with uranyl acetate and lead citrate, and observed  
147 under transmission electron microscope (JEM-1400Plus, JEOL Co, Japan). The density of plasmodesmata was  
148 determined according to the number of plasmodesmata per 5  $\mu\text{m}$  (including MS-BS, BS-BS, BS-PP) (Chen *et al.*,  
149 2020). After the embedded samples were treated with saw blade and blade, the semi-thin sections (thickness 2  $\mu\text{m}$ )  
150 were cut by an automatic semi-thin rotary cutting machine (LEICA RM2265, Leica Microsystems Co., Ltd.,  
151 Germany) and triangular glass knife. A drop of double-distilled water was dropped on the clean slide in advance,  
152 and the sliced semi-thin slices were placed on the double-distilled water with tweezers. The slices were placed on a  
153 digital hotplate (Benchmark H3760-H, Fotronic Co, USA), and dried at 50 °C. Then the slices were further  
154 microscopically examined using a fluorescence microscopy imaging system (OlympusBX51, Olympus Co., Tokyo,  
155 Japan) and photographed to calculate the number and area of the Kranz anatomy with Image J (Version 1.8.0,  
156 National Institutes of Health) software (Ren *et al.*, 2016).

#### 157 **RNA isolation, reverse transcription, and real time PCR (qPCR) analysis**

158 At R3 stage, 3 representative plants of each treatment were selected, and the ear-position leaves were stored at  
159 -80°C for the determination of relative gene expression levels of *SUT1*, *SWEET13a*, *SWEET13b* and *SWEET13c*.  
160 Total RNA was extracted using an HiPure Plant RNA Mini Kit (MGBio). RNA concentration and purity were  
161 assessed using NanoDrop2000 microultraviolet spectrophotometer (Thermo Scientific, USA). Afterwards, the  
162 isolated RNA sample was used as template for complementary DNA (cDNA) synthesis using oligo (dT)s and  
163 abm's proprietary OneScript<sup>®</sup> Hot Reverse Transcriptase (Invitrogen). For qPCR, Bestar<sup>®</sup> SybrGreen qPCR  
164 Mastermix (DBI<sup>®</sup> Bioscience, Germany) was used in the reaction mixture according to the manufacturer's  
165 instructions, and reactions were performed in eight-link boards on QuantStudio<sup>™</sup> 6 Flex Real-Time PCR System  
166 (Applied Biosystems, USA) with cycling conditions (50 °C 2 min, 95 °C 2 min, 95 °C 10 s, 60 °C 20 s, 40 cycles,  
167 95 °C 15 s, 55 °C 1 min). Primers were listed in Supplementary Table S1 at JXB online. 3 biological replicates  
168 were determined for each sample, and 3 technical replicates were performed for each biological replicate. The  
169 obtained data was used to calculate the relative expression of genes by 2<sup>- $\Delta\Delta\text{Ct}$</sup>  method (Livak and Schmittgen,  
170 2001).

#### 171 **Stalk trait measurements**

172 At R3 stage, 4 representative plants were selected for each treatment and about 1.5 cm stem at the middle part of  
173 the spike node and shank was fixed in the Carnoy fixative and stored with 70% ethanol. Thin slices were cut using  
174 the method of free hand section and stained with safranin. The slices were further microscopically examined using  
175 a fluorescence microscopy imaging system (OlympusBX51, Olympus Co., Tokyo, Japan) and photographed to  
176 calculate the number and area of big, small vascular bundle per visual field with Image J (Version 1.8.0, National

177 Institutes of Health) software (Guo *et al.*, 2016).

#### 178 **Grain filling process measurement**

179 A total of 30 plants with similar growth patterns that silked on the same day were labeled. 5 tagged ears from  
180 each plot were sampled at 10-day intervals from silking until maturity stage; 100 grains were sampled from the  
181 middle part of the ear and oven-dried at 85°C to a constant weight. Grain filling process was simulated by  
182 Logistics equation:  $W = a / [1 + b \times \exp(-c \times t)]$ , where  $W$  = grain weight (g);  $t$  = number of days after silking;  $a$   
183 was the potential kernel weight (g),  $b$  and  $c$  were coefficients determined by regression. The grouting parameters  
184 were calculated by the following formula (Shi *et al.*, 2013):

185 Days for the maximum grain filling rate ( $T_{max}$ , d):  $T_{max} = \ln b / c$ ;

186 Dry matter accumulation under the maximum grain filling rate ( $W_{max}$ , g):  $W_{max} = a / [1 + b \times \exp(-c \times T_{max})]$ ;

187 Maximum grain filling rate ( $G_{max}$ , g 100kernel<sup>-1</sup> d<sup>-1</sup>):

188  $G_{max} = a \times b \times c \times \exp(-c \times T_{max}) / [1 + b \times \exp(-c \times T_{max})]^2$ ;

189 Mean grain filling rate ( $G_{mean}$ , g 100kernel<sup>-1</sup> d<sup>-1</sup>):  $G_{mean} = a \times c / 6$ ;

190 Active grain filling period ( $D$ , d):  $D = a / G_{mean}$ .

#### 191 **Assay of sucrose, and starch contents**

192 At R3 stage, 3 plants were sampled from each treatment and separated into ear leaves and ears. All samples  
193 were dried, weighed, and ball milled. 100 mg tissue samples were extracted directly in 7 mL boiling water for 20  
194 min, the supernatant was collected, and the residues were extracted a second time in 7 mL boiling water for 20 min.  
195 The extract was then diluted to 50 mL constant volume with deionized water and named solution A. In addition, 4  
196 mL water and 2 mL 9.2 N HClO<sub>4</sub> were added to the residues, then were placed in boiling bath for 20 min. After  
197 this, the supernatant was collected, and the residues were extracted a second time in 5 mL water and 1 mL 9.2N  
198 HClO<sub>4</sub> in boiling bath for 20 min. The extract was then diluted to 50 mL constant volume with deionized water and  
199 named solution B. For sucrose content analysis, 100 μL solution A was reacted with 100 μL KOH (30%) for 10  
200 min in a boiling water bath, cooled, and added to 3 mL anthracenone solution after cooling, and absorbance at 620  
201 nm was measured. For starch content analysis, 100 μL solution B was reacted with 3 mL anthracenone solution for  
202 10 min in a boiling water bath and cooled, and absorbance at 620 nm was measured (Hu *et al.*, 2022).

#### 203 **Enzyme activity assays**

204 3 representative plants were selected in each treatment at R3 stage, and fresh samples of ear leaves (avoiding  
205 leaf veins) and grains were taken respectively, frozen with liquid nitrogen and stored in -80 °C refrigerator.  
206 PEPC, NADP-ME, Rubisco, SPS activities in leaves and fructose content, sucrose synthase (SUS), cell wall  
207 invertase (CWI) activities in grains were operated according to manufacturer instructions (Cominbio,  
208 www.cominbio.com).

#### 209 **Data analysis**

210 Statistical analyses were performed in Excel 2019 (Microsoft, Redmond, WA, United States) and IBM SPSS  
211 Statistics 21.0 (IBM Corporation, Armonk, NY, USA). One-way ANOVA with the least significant difference test  
212 (LSD,  $\alpha = 0.05$ ) was used to test the difference of yield, grain weight and maximum filling rate among different  
213 treatments. Figures were produced with Sigmaplot 14.0 (Systat Software, San Jose, CA).

## 214 **Results**

### 215 **Yield, dry matter accumulation and distribution**

216 The yield of summer maize was significantly reduced under low light stress, and the trend was consistent in  
217 the two years. Compared with CK, harvest ear number, grain number per ear, 1000-grain weight and yield of S  
218 treatment were decreased by 0.9 %, 41.3 %, 13.3 % and 49.28 % on average (Table 2). The ear picture of the two  
219 treatments was shown in Figure 1. Dry matter accumulation and grain distribution ratio of summer maize were  
220 significantly reduced under low light stress (Figure 2). The trend was consistent in the two years. The rust was

221 serious in 2020, and the data in 2021 were analyzed. At VT stage,  $DWP_S$  and  $DWP_L$  in CK treatment were 63.8 %  
222 and 36.2 %. At R3 stage,  $DW_S$ ,  $DW_L$  and  $DW_G$  of S treatment were decreased by 16.4 %, 18.2 % and 59.8 %  
223 compared with CK, and  $DWP_S$ ,  $DWP_L$  and  $DWP_G$  were decreased by -10.5 %, -4.8 % and 12.9 %. At R6 stage,  
224  $DW_S$ ,  $DW_L$  and  $DW_G$  of S treatment decreased by 18.8 %, 14.2 % and 51.4 %,  $DWP_S$ ,  $DWP_L$  and  $DWP_G$   
225 decreased by -7.1 %, -4.9 % and 12.6 %. Dry matter production was decreased significantly after flowering under  
226 low light stress, and dry matter in grain mainly came from dry matter accumulated before flowering. TBA, TRBA,  
227 TFGR, PAA and PFGR of S treatment were significantly lower than those of CK by -98.0%, -15.6%, -47.1%,  
228 79.5% and 47.1%, respectively (Figure 2A, B).

#### 229 **Gas exchange parameters in ear leaf**

230 The photosynthetic rate of summer maize was significantly reduced under low light stress, and the change  
231 trend was consistent in the two years (Table 3). The  $C_i$ ,  $G_s$ ,  $P_n$  and  $E$  of S treatment were 22.8 %, 38.0 %, 19.5 %  
232 and 18.5 % lower than those of CK on average.

#### 233 **Observation of Kranz anatomy and determination of plasmodesmata densities**

234 After low light stress, the number and area of Kranz anatomy in the rank-2 intermediate veins of the ear leaf  
235 were decreased. Compared with CK, the spacing of two Kranz anatomy in S treatment increased by 19.0 %, the  
236 average area of Kranz anatomy decreased by 9.9 %, and the density of Kranz anatomy per unit length decreased by  
237 19.4 % (Figure 3).

238 There were many chloroplasts and ordered arrangement in vascular bundle sheath cells treated with CK, and  
239 the number of starch granules was increased. There were many mitochondria in PP; the companion cells had dense  
240 cytoplasm, rich mitochondria and endoplasmic reticulum. The number of chloroplasts and starch granules in  
241 vascular bundle sheath cells treated with S was decreased; few mitochondria in PP; the companion cells were  
242 obviously vacuolated, containing a small amount of mitochondria and endoplasmic reticulum. There was no  
243 significant difference in the density of plasmodesmata between MS, BS and PP (Figure 4, 5).

#### 244 **Sucrose transporter expression**

245 Compared with CK, S treatment increased the relative expression of *SWEET13b* in leaves, while there was no  
246 significant difference in the relative expression of *SUT1*, *SWEET13a* and *SWEET13c* (Figure 6).

#### 247 **Number and area of vascular bundles**

248 The number of vascular bundles and the area of small vascular bundles were significantly reduced under low  
249 light stress. The area of large vascular bundles in shank was significantly reduced under low light stress, and there  
250 was no significant difference in the number of vascular bundles. The number of large and small vascular bundles in  
251 spike node of S treatment was 25.0% and 19.0% lower than that of CK; the total area, xylem area and phloem area  
252 of large vascular bundle were 1.8%, 8.2% and -0.4% lower than those of CK; small vascular bundle area decreased  
253 by 32.3% compared with CK. The number of large and small vascular bundles in shank of S treatment was 5.6%  
254 and 6.0% lower than that of CK. The total area, xylem area and phloem area of large vascular bundle were 26.7%,  
255 10.3% and 32.5% lower than those of CK; the area of small vascular bundle was 1.0% lower than that of CK  
256 (Figure 7).

#### 257 **Grain filling parameters**

258 Maximum grain filling rate was significantly reduced and active grain filling period was shortened under low  
259 light stress.  $T_{max}$ ,  $W_{max}$ ,  $G_{max}$ ,  $G_{mean}$  and  $D$  of S treatment were -6.6%, 32.6%, 28.4%, 0.1% and 4.4% lower  
260 than CK (Figure 1).

#### 261 **Concentrations of sucrose and starch**

262 The contents of sucrose and starch in ear leaves and grains of summer maize was changed under low light  
263 stress. In 2021, the concentrations of sucrose, starch and the ratio of starch to sucrose (S / S) in ear leaves and  
264 grains of S treatment were 41.5%, 85.1%, -5.9% and 97.3%, 509.9%, 19.7% lower than those of CK, respectively.

265 From the sucrose concentration gradient between source and sink, the sucrose concentration in ear leaves of S  
266 treatment was lower than that of CK, while the sucrose concentration in grains of S treatment was higher than that  
267 of CK (Figure 8).

#### 268 **Sucrose-starch metabolic enzyme activity**

269 Low light stress significantly reduced Rubisco, PEPC, NADP-ME, SPS enzyme activities in ear leaves and  
270 SUS, AGPase enzyme activities, fructose content in grains. The activities of Rubisco, PEPC, NADP-ME, SPS and  
271 AGPase in ear leaves of S treatment were decreased by 25.2 %, 47.8 %, 63.0 %, 35.8 % and 3.7 % compared with  
272 CK. Compared with CK, the activities of SUS and AGPase and fructose content in grains of S treatment decreased  
273 by 15.5 %, 18.2 % and 10.46 %, respectively, and there was no significant difference in CWI activity (Figure 9).

#### 274 **Discussion**

##### 275 **Low light changed the ability of leaves to synthesize sucrose and transport sucrose to grain**

276 The main source of grain yield was photoassimilates formed after silking (Shi *et al.*, 2015). The synthesis and  
277 activation of Rubisco, PEPC and NADP-ME were induced by light. This study showed that under a low light  
278 environment, the activities of NADP-ME, PEPC and Rubisco in leaves was decreased, and the  $C_i$  was decreased,  
279 resulting in the decrease of photosynthetic rate and the decrease of assimilates. The results were consistent with  
280 Zhang *et al.* (Zhang *et al.*, 2007, 2008). The triose phosphate produced during the Calvin cycle was transported to  
281 the cytoplasm by the Triose phosphate / phosphate translocator (TPT), which synthesized sucrose by SPS and then  
282 transported to the grain. The results showed that the activity of AGPase remained unchanged and the activity of  
283 SPS was decreased after shading, resulting in the decrease of sucrose content, the increase of starch content and  
284 the increase of the ratio of starch to sucrose. The results were consistent with Liang *et al.* (Liang *et al.*, 2020). The  
285 activity of TPT was affected by light (Wang *et al.*, 2002), and high concentration of inorganic phosphate (Pi)  
286 inhibited the activities of AGPase and SPS. Ning *et al.* have shown that nitrogen deficiency in leaves led to low  
287 activity of TPT, resulting in reduced triose phosphate transported out of chloroplasts and reduced Pi transported  
288 into chloroplasts (Ning *et al.*, 2018). Therefore, it was speculated that under low light conditions, the expression  
289 level of TPT in leaves was low, resulting in a decrease in triose phosphate transported to cytoplasm, and an  
290 increase in the proportion of RuBP regeneration and starch synthesis. In addition, the triose phosphate in  
291 cytoplasm decreased, the stimulation on SPS activity decreased, and the synthesis of sucrose was blocked,  
292 resulting in an increase in the ratio of starch to sucrose. However, it is difficult to determine the output rate of  
293 triose phosphate at present, and the above conjecture needs further verification in the future. Bundle sheath cells in  
294 Rank-2 intermediate veins were closely linked to mesophyll cells, mainly responsible for sucrose loading into  
295 phloem. However, low light down-regulated the expression of enzymes related to glycolysis (Gao *et al.*, 2020),  
296 inhibited glycolysis metabolism and lacked energy, leading to premature senescence of leaves (Huang *et al.*, 2020;  
297 Wu *et al.*, 2021), in which bundle sheath cells senescence faster than mesophyll cells (Wu *et al.*, 2021). In this  
298 study, we also found that under low light stress, the number and area of Kranz anatomy was reduced, the number  
299 of chloroplasts in bundle sheath cells was decreased, and the number of mitochondria in PP was decreased,  
300 accompanied by obvious vacuoles, which was consistent with the symptoms of premature senescence. In addition,  
301 energy consumption was required for sucrose efflux and entry the CC-SE complex during active apoplasmic  
302 loading of summer maize (Bezrutezyk *et al.*, 2021). Under low light conditions, the number of mitochondria in PP  
303 cells and companion cells decreased, and the energy supply was insufficient. It was difficult for sucrose to move to  
304 SE, and the output power was small. Chen *et al.* have shown that SWEET13 in Arabidopsis protected the normal  
305 efflux of sucrose under low light conditions (Chen *et al.*, 2011). Interestingly, this study also found that the  
306 frequency of plasmodesmata between MS-BS-PP and the expression of transporters responsible for efflux and  
307 absorption of sucrose were not affected by low light, which might be a manifestation of summer maize adapting to  
308 low light. Mathan *et al.* (2021) quantitatively analyzed the sucrose loading capacity in the phloem of detached rice

309 leaves by detecting the isotope content. In the future, more convenient and accurate methods are needed to  
310 determine the sucrose concentration and sucrose loading rate in the phloem of maize leaves under low light  
311 conditions to explain the mechanism of source-sink relationship change. In conclusion, the synthesis ability of  
312 sucrose in leaves and the export sucrose to grains ability of leaves were reduced under low light.

313 **In low light conditions, stem dry matter transport was increased, but due to this, long-distance transport of**  
314 **light contract compounds was limited.**

315 Part of the dry matter required for grain filling came from the dry matter transported by stems, and the other  
316 part came from the dry matter synthesized by leaves. This study showed that under low light conditions, when the  
317 dry matter produced by leaves could not meet the grain filling, the dry matter accumulation before flowering in  
318 vegetative organs was increased, and its contribution rate to grain was greater than that of photosynthetic  
319 assimilation after flowering to grain. This was consistent with the results of Wang et al. (2020) and Yang et al.  
320 (2021). Our previous research group also obtained (Gao *et al.*, 2017) that the contribution rate of stem-transported  
321 dry matter to grain accounted for 86 % of the contribution rate of pre- flowering dry matter transport to grain yield,  
322 and the spike node and its upper and lower nodes were the most transported. Although dry matter transport in stem  
323 was increased, this adaptation mechanism could not compensate for the loss of yield and had a negative impact on  
324 long-distance transport of photosynthetic assimilates. Previous studies have found that the number and area of  
325 vascular bundles were closely related to the non-structural carbohydrate transport, seed setting rate, harvest index  
326 and yield of stem and sheath, and small vascular bundles contributed more to yield due to the high density of  
327 plasmodesmata in phloem (Li *et al.*, 2019). In this experiment, we found that the number and area of small and  
328 medium-sized vascular bundles in spike node and the area of large vascular bundles in shank were reduced under  
329 low light, which resulted in the long-distance transport of sucrose in stem was limited, the transport rate was  
330 decreased, the “flow” was not smooth, affecting the grain filling rate and filling time.

331 **Low light altered the utilize sucrose ability of grains**

332 After long-distance transportation of sucrose to grains, on the one hand, it was hydrolyzed by CWI and  
333 entered cells under the action of transporters. On the other hand, it was directly transported into cells by sucrose  
334 transporters (Zhang *et al.*, 2018). After sucrose entered the grain, starch was synthesized through a series of  
335 enzymes. The results showed that CWI activity was remained unchanged, but the activities of SUS and AGPase  
336 were decreased, resulting in the decrease of fructose and starch content. The results were consistent with research  
337 results of Zhang et al. (2008). The process of leaf synthesis, sucrose loading and sucrose utilization in grains was  
338 affected under low light, resulting in relatively higher sucrose concentration in grains than in leaves, forming a  
339 “leaf low” - “grain high” sugar concentration gradient, resulting in the opposite hydrostatic pressure, and then  
340 feedback inhibition of sucrose output in leaves, reducing sucrose loading and transportation rate (Figure 10). In  
341 summary, the direction of dry matter distribution was changed under low light, and the insufficient supply of dry  
342 matter and low photoassimilation ability led to insufficient grain plumpness, decreased grain number per ear and  
343 grain weight, and significantly reduced grain yield. Among them, the decrease of leaf photosynthetic rate was the  
344 main reason for yield reduction. The key to solving this problem in the future is to improve the photosynthetic  
345 capacity of leaves by screening shade-tolerant varieties or cultivation measures (such as increasing nitrogen  
346 fertilizer, removing top leaves, spraying growth regulators and foliar fertilizer), ensure the supply of sucrose in  
347 grains, alleviate the competition between leaves and grains for limited sucrose, and achieve stable and high yield  
348 of summer maize.

349 **Conclusions**

350 Due to insufficient light, the dry matter production after flowering of summer maize leaves was seriously  
351 decreased, the number and area of Kranz anatomy were reduced, and the phloem cells were vacuolated, resulting  
352 in the decrease of sucrose synthesis in leaves and the export sucrose to grains ability of leaves. Stem dry matter



353 transport was increased before flowering in order to meet the needs of grain filling, but this adaptation mechanism  
354 could not compensate for the loss of yield, and also led to the decrease of the number and area of stem vascular  
355 bundles, the obstruction of dry matter transport and the decrease of grain filling rate. Yield was significantly  
356 decreased under low light stress by affecting photoassimilates synthesis, distribution of photoassimilates from leaf  
357 to ear, transportation of photoassimilates from stem to ear and utilization of photoassimilates in grain.

#### 358 **Author Contribution**

359 Jiwang Zhang and Zhichao Sun involved in to conceptualization. Zhichao Sun and Wenjie Geng involved in  
360 methodology. Baizhao Ren, Peng Liu and Bin Zhao involved in formal analysis. Zhichao Sun and Wenjie Geng  
361 involved in investigation. Jiwang Zhang involved in resources. Zhichao Sun and Wenjie Geng involved in data  
362 curation. Zhichao Sun and Jiwang Zhang writing—original draft preparation and writing—review and editing. All  
363 the authors have read and agreed to the published version of the manuscript.

#### 364 **Data Availability**

365 All data supporting the findings of this study are available within the paper and within its supplementary  
366 materials published online. Further inquiries can be directed to the corresponding author (Zhang Jiwang), upon  
367 request.

#### 368 **Funding**

369 This study was supported by China Agriculture Research System of MOF and MARA (CARS-02-21),  
370 Shandong Province Key Research and Development Project (2021LZGC014-2) and Shandong Central Guiding the  
371 Local Science and Technology Development (YDZX20203700002548).

#### 372 **Conflicts of interest**

373 The authors have no conflicts to declare.

#### 374 **References**

- 375 Bezruczyk M, Hartwig T, Horschman M, Char S N, Yang J L, Yang B, Frommer W B, Sosso D. 2018. Impaired  
376 phloem loading in *zmsweet13a, b, c* sucrose transporter triple knock-out mutants in *Zea mays*. *New Phytologist*  
377 218, 594–203.
- 378 Bezruczyk M, Zllner N R, Kruse C, Hartwig T, Lautwein T, Köhrer K, Frommer W B, Kim J Y. 2021. Evidence  
379 for phloem loading via the abaxial bundle sheath cells in maize leaves. *The Plant Cell* 33, 531–547.
- 380 Bilska-Kos A, Grzybowski M, Jończyk M, Sowin'ski P. 2016. In situ localization and changes in the expression  
381 level of transcripts related to intercellular transport and phloem loading in leaves of maize (*Zea mays* L.) treated  
382 with low temperature. *Acta Physiologiae Plantarum* 38, 1–10.
- 383 Braun D M. 2022. Phloem loading and unloading of sucrose: what a long, strange trip from source to sink. *Annual*  
384 *Review of Plant Biology* 73, 1–15.
- 385 Chen G P, Chen H, Shi K, *et al.* 2020. Heterogeneous light conditions reduce the assimilate translocation towards  
386 maize ears. *Plants* 9, 1–15.
- 387 Chen L Q, Qu X Q, Hou B H, Sosso D, Osorio S, Fernie A R, Frommer W B. 2011. Sucrose efflux mediated by  
388 SWEET proteins as a key step for phloem transport. *Science* 335, 207–211.
- 389 Chollet Raymond, Vidal Jean, O'Leary Marion H. 1996. Phosphoenolpyruvate carboxylase: a ubiquitous, highly  
390 regulated enzyme in plants. *Annual Review of Plant Physiology and Plant Molecular Biology* 47, 273–298.
- 391 Gao J, Liu Z, Zhao B, Liu P, Zhang J W. 2020. Physiological and comparative proteomic analysis provides new  
392 insights into the effects of shade stress in maize (*Zea mays* L.). *BMC Plant Biology* 20, 1–13.
- 393 Gao J, Zhao B, Dong S, Liu P, Ren B Z, Zhang J W. 2017. Response of summer maize photosynthate accumulation  
394 and distribution to shading stress assessed by using <sup>13</sup>CO<sub>2</sub> stable isotope tracer in the field. *Frontiers in Plant*  
395 *Science* 8, 1821–1833.
- 396 Godfray H C J, Beddington J R, Crute I R, Haddad L, Lawrence D, Muir J F, Pretty J, Robinson S, Thomas S M,

- 397 Toulmin C. 2010. Food security: the challenge of feeding 9 billion people. *Science* 327, 812–818.
- 398 Guo Y Q, Zhu Y L, Liu K, Pei S J, Zhao B, Zhang J W. 2016. Effects of water-potassium interaction on stalk  
399 structure and function of high-yield summer maize. *Chinese Journal of Applied Ecology* 27, 143–149.
- 400 Hu J, Ren B Z, Dong S T, Liu P, Zhao B, Zhang J W. 2022. Poor development of spike differentiation triggered by  
401 lower photosynthesis and carbon partitioning reduces summer maize yield after waterlogging. *The Crop Journal* 10,  
402 478–489.
- 403 Huang X H, Ren B Z, Zhao B, Liu P, Zhang J W. 2020. Effects of phytase Q9 on the yield and senescence  
404 characteristics of summer maize shaded in the field. *Chinese Journal of Applied Ecology* 31, 3433–3444.
- 405 Ishibashi Y, Okamura K, Miyazaki M, Phan T, Yuasa T, Iwaya-Inoue M. 2014. Expression of rice sucrose  
406 transporter gene OsSUT1 in sink and source organs shaded during grain filling may affect grain yield and quality.  
407 *Environmental and Experimental Botany* 97, 49–54.
- 408 Lamichhane J R, Reay-Jones F P F. 2021. Editorial: impacts of COVID-19 on global plant health and crop  
409 protection and the resulting effect on global food security and safety. *Crop Protection* 139, 105383–105386.
- 410 Li G H, Zhou C Y, Guo B W, Wei H Y, Huo Z Y, Dai Q G, Zhang H C, Xu K. 2019. Sucrose phloem loading and  
411 its relationship with grain yield formation in rice. *Plant Physiology Journal* 55, 891–901.
- 412 Liang X G, Gao Z, Shen S, Paul M J, Zhang L, Zhao X, Lin S, Wu G, Chen X M, Zhou S L. 2020. Differential ear  
413 growth of two maize varieties to shading in the field environment: Effects on whole plant carbon allocation and  
414 sugar starvation response. *Journal of Plant Physiology* 251, 153194–153205.
- 415 Livak K J and Schmittgen T D. 2001. Analysis of relative gene expression data using real-time quantitative PCR  
416 and the  $2^{-\Delta\Delta CT}$  Method. *Methods* 25, 402–4088
- 417 Mathan J, Singh A, Ranjan A. 2021. Sucrose transport and metabolism control carbon partitioning between stem  
418 and grain in rice. *Journal of Experimental Botany* 72, 4355–4372.
- 419 Ning P, Yang L, Li C J, Fritschi F B. 2018. Post-silking carbon partitioning under nitrogen deficiency revealed sink  
420 limitation of grain yield in maize. *Journal of Experimental Botany* 69, 1707–1719.
- 421 Patrick J W. 2013. Does Don Fisher's high-pressure manifold model account for phloem transport and resource  
422 partitioning? *Frontiers in Plant Science* 4, 184–201.
- 423 Ramanathan V, Feng Y. 2009. Air pollution, greenhouse gases and climate change: global and regional  
424 perspectives. *Atmospheric Environment* 43, 37–50.
- 425 Ren B Z, Cui H Y, Camberato J J, Dong S T, Liu P, Zhao B, Zhang J W. 2016. Effects of shading on the  
426 photosynthetic characteristics and mesophyll cell ultrastructure of summer maize. *The Science of Nature* 103,  
427 67–79.
- 428 Shao L P, Liu Z J, Li H Z, *et al.* 2021. The impact of global dimming on crop yields is determined by the  
429 source–sink imbalance of carbon during grain filling. *Global Change Biology* 27, 689–708.
- 430 Sharwood R E, Sonawane B V, Ghannoum O. 2014. Photosynthetic flexibility in maize exposed to salinity and  
431 shade. *Journal of Experimental Botany* 65, 3715–3724.
- 432 Shi J G, Cui H Y, Zhao B, Dong S T, Liu P, Zhang J W. 2013. Effect of light on yield and characteristics of  
433 grain-filling of summer maize from flowering to maturity. *Scientia Agricultura Sinica* 46, 4427–4434.
- 434 Shi J G, Zhu K L, Cao H Y, Dong S T, Liu P, Zhao B, Zhang J W. 2015. Effect of light from flowering to maturity  
435 stage on dry matter accumulation and nutrient absorption of summer maize. *Chinese Journal of Applied Ecology*  
436 26, 46–52.
- 437 Slewinski T L, Meeley R, Braun D M. 2009. Sucrose transporter1 functions in phloem loading in maize leaves.  
438 *Journal of Experimental Botany* 60, 881–892.
- 439 Stitt M, Zeeman S C. 2012. Starch turnover: pathways, regulation and role in growth. *Current Opinion in Plant*  
440 *Biology* 15, 282–292.

- 441 Wang J, Shi K, Lu W P, Lu D L. 2020. Post-silking shading stress affects leaf nitrogen metabolism of spring maize  
442 in southern china. *Plants* 9, 1–15.
- 443 Wang Q M, Chen J, Wang X C, Sha W, Sun J Y. 2002. Cloning and Expression Analysis of Triose  
444 Phosphate/Phosphate Translocator Gene from Wheat. *Acta Botanica Sinica* 44, 67–71.
- 445 Wang X Q, Huang W D. 2003. Effects of weak light on the ultrastructural variations of phloem tissues in source  
446 leaves of three-year-old nectarine trees (*Prunus persica* L.var. *nectarina* Ait.). *Acta Botanica Sinica* 45, 688–697.
- 447 Wu H Y, Liu L A, Shi L, Zhang W F, Jiang C D. 2021. Photosynthetic acclimation during low-light-induced leaf  
448 senescence in post-anthesis maize plants. *Photosynthesis Research* 150, 313–326.
- 449 Wu X J, Huang L M, Su Q. 2014. Advances in function and influencing factors of rubisco in marine phytoplankton.  
450 *Ecological Science* 33, 166–172.
- 451 Yang Y S, Guo X X, Liu G Z, Liu W M, Xue J, Ming B, Xie R Z, Wang K R, Hou P, Li S K. 2021. Solar radiation  
452 effects on dry matter accumulations and transfer in maize. *Frontiers in Plant Science* 12, 727134.
- 453 Zhang C X, Fu G F, Feng B H, Chen T T, Tao L X. 2018. Mechanisms of Assimilation Transport in Phloem of Rice  
454 and Its Response to Abiotic Stress 39, 73–83.
- 455 Zhang J W, Dong S T, Wang K J, Hu C H, Liu P. 2006. Effects of shading on the growth, development and grain  
456 yield of summer maize. *Chinese Journal of Applied Ecology* 17, 657–662.
- 457 Zhang J W, Dong S T, Wang K J, Hu C H, Liu P. 2007. Effects of shading in field on photosynthetic characteristics  
458 in summer corn. *Acta Agronomica Sinica* 33, 216–222.
- 459 Zhang J W, Dong S T, Wang K J, Hu C H, Liu P. 2008. Effects of Shading in Field on Key Enzymes Involved in  
460 Starch Synthesis of Summer Maize. *Acta Agronomica Sinica* 34, 1470–1474.
- 461 Zhang Y, Zhang D B, Liu M. 2015. The molecular mechanism of long-distance sugar transport in plants. *Chinese*  
462 *Bulletin of Botany* 50, 107–121

Table

Table 1. Effects of low-light stress on the microclimate in experimental field. Different lowercase letters in the same column indicate significant difference at  $P < 0.05$  by LSD test.

Table 2. Effects of low-light stress on yield and its components of summer maize. Different lowercase letters in the same column indicate significant difference at  $P < 0.05$  by LSD test.

Table 3. Effects of low-light stress on gas exchange parameters in ear leaves of summer maize. Different lowercase letters in the same column indicate significant difference at  $P < 0.05$  by LSD test.

Table 1. Effects of low-light stress on the microclimate in experimental field

| Treatment | Light intensity ( $\mu\text{mol m}^{-2} \text{s}^{-1}$ ) |        |        | Air speed<br>( $\text{m s}^{-1}$ ) | Temperature<br>( $^{\circ}\text{C}$ ) | Relative<br>humidity (%) | CO <sub>2</sub> concentration<br>( $\mu\text{mol mol}^{-1}$ ) |
|-----------|----------------------------------------------------------|--------|--------|------------------------------------|---------------------------------------|--------------------------|---------------------------------------------------------------|
|           | Canopy                                                   | Ear    | Ground |                                    |                                       |                          |                                                               |
| CK        | 799.2a                                                   | 284.a  | 121.0a | 0.4a                               | 32.4a                                 | 75.4a                    | 284.9a                                                        |
| S         | 316.1b                                                   | 137.2b | 57.6b  | 0.3a                               | 31.1a                                 | 77.0a                    | 298.6a                                                        |

S: Shading from flowering to maturity stage; CK: Normal light from flowering to maturity stage. Different lowercase letters in the same column indicate significant difference at  $P < 0.05$  by LSD test.

Table 2. Effects of low-light stress on yield and its components of summer maize

| Year | Treatment | Harvest ear number<br>(ears $\text{ha}^{-1}$ ) | Grains per ear | 1000-grain<br>weight (g) | Yield (kg $\text{ha}^{-1}$ ) |
|------|-----------|------------------------------------------------|----------------|--------------------------|------------------------------|
| 2020 | CK        | 59,259a                                        | 587a           | 378a                     | 13,136a                      |
|      | S         | 59,675a                                        | 342b           | 325b                     | 6623b                        |
| 2021 | CK        | 65,108a                                        | 561a           | 288a                     | 10,529a                      |
|      | S         | 64,045a                                        | 332b           | 252b                     | 5373b                        |

S: Shading from flowering to maturity stage; CK: Normal light from flowering to maturity stage. Different lowercase letters in the same column indicate significant difference at  $P < 0.05$  by LSD test.

Table 3. Effects of low-light stress on gas exchange parameters in ear leaves of summer maize

| Year | Treatment | Ci<br>( $\mu\text{mol mol}^{-1}$ ) | Gs<br>( $\text{mmol m}^{-2} \text{s}^{-1}$ ) | P <sub>n</sub><br>( $\mu\text{mol m}^{-2} \text{s}^{-1}$ ) | E<br>( $\text{mmol m}^{-2} \text{s}^{-1}$ ) |
|------|-----------|------------------------------------|----------------------------------------------|------------------------------------------------------------|---------------------------------------------|
| 2020 | CK        | 125.0a                             | 339.7a                                       | 34.5a                                                      | 7.4a                                        |
|      | S         | 93.5b                              | 210.5b                                       | 27.1b                                                      | 5.9b                                        |
| 2021 | CK        | 111.1a                             | 406.0a                                       | 36.0a                                                      | 6.6a                                        |
|      | S         | 88.5b                              | 252.0b                                       | 29.7b                                                      | 5.5b                                        |

S: Shading from flowering to maturity stage; CK: Normal light from flowering to maturity stage. Ci: Intercellular carbon dioxide concentration; Gs: Stomatal conductance; P<sub>n</sub>: Net photosynthetic rate; E: Transpiration rate. Different lowercase letters in the same column indicate significant difference at  $P < 0.05$  by LSD test.

#### Figure legends

Figure 1. Effects of low-light stress on the characteristic parameters of grain-filling of summer maize. S: Shading from flowering to maturity stage; CK: Normal light from flowering to maturity stage;  $T_{max}$ : Days for the maximum grain filling rate;  $W_{max}$ : Dry matter accumulation under the maximum grain filling rate;  $G_{max}$ : Maximum grain filling rate;  $G_{mean}$ : Mean grain filling rate; D: Active grain filling period. Different lowercase letters in the same column indicate significant difference at  $P < 0.05$  by LSD test.

Figure 2. Effects of low-light stress on dry matter accumulation and distribution of summer maize. (A) Effects of low light stress on dry matter accumulation and distribution of summer maize in 2020. (B) Effects of low light stress on dry matter accumulation and distribution of summer maize in 2021. S: Shading from flowering to maturity stage; CK: Normal light from flowering to maturity stage; PAA: The amount of assimilated dry matter after flowering; TBA: Dry matter translocation of pre-flowering; TFGR: Contribution rate of pre-flowering dry matter to grain; TRBA: Dry matter transport rate of pre-flowering; PAGR: Contribution rate of dry matter assimilation to grain after flowering. Different lowercase letters in the same column indicate significant difference at  $P < 0.05$  by LSD test.

Figure 3. Effects of low-light stress on the number and area of Kranz anatomy in rank-2 intermediate veins of summer maize. S: Shading from flowering to maturity stage; CK: Normal light from flowering to maturity stage. BL: Bulliform cell; MS: Mesophyll cell; BS: Bundle sheath cell. The scale bar is 100  $\mu\text{m}$ . Different lowercase letters in the same column indicate significant difference at  $P < 0.05$  by LSD test.

Figure 4. Effects of low-light stress on ultrastructure of summer maize leaves (2500 $\times$ ). a, c: CK; b, d: S. S: Shading from flowering to maturity stage; CK: Normal light from flowering to maturity stage. BS: Bundle sheath cell; PP: Phloem parenchyma cell; CC: Companion cell; SE: Sieve element; X: Xylem.

Figure 5. Effects of low-light stress on the number of plasmodesmata in leaves of summer maize. a, c, e: Denotes the plasmodesmata between MS and BS, the plasmodesmata between BS and BS, and the number of starch grains in BS of CK; b, d, f: Denotes the plasmodesmata between MS and BS, the plasmodesmata between BS and BS, and the number of starch grains of S. S: Shading from flowering to maturity stage; CK: Normal light from flowering to maturity stage. BS: Bundle sheath cell; MS: Mesophyll cell; PD: Plasmodesmata; PP: Phloem parenchyma cell; S: Starch grain; Ch: Chloroplast; X: Xylem. Different lowercase letters in the same column indicate significant difference at  $P < 0.05$  by LSD test.

Figure 6. Effects of low-light stress on relative mRNA levels of sucrose transporter in summer maize leaves. S: Shading from flowering to maturity stage; CK: Normal light from flowering to maturity stage. The names of sucrose transporter are indicated at the top. Different lowercase letters in the same column indicate significant difference at  $P < 0.05$  by LSD test.

Figure 7. Effects of low-light stress on the structure of small vascular bundle and central vascular bundle of spike node and ear shank in summer maize (40 $\times$ ). a, c: Denotes the structure of small vascular bundle and central vascular bundle of spike node of CK. b, d: Denotes the structure of small vascular bundle and central vascular bundle of spike node of S. e, g: Denotes the structure of small vascular bundle and central vascular bundle of ear shank of CK. f, h: Denotes the structure of small vascular bundle and central vascular bundle of ear shank of S. S: Shading from flowering to maturity stage; CK: Normal light from flowering to maturity stage. Different lowercase letters in the same column indicate significant difference at  $P < 0.05$  by LSD test.

Figure 8. Effects of low-light stress on sucrose and starch contents in ear leaf and grain of summer maize. (A) Effects of low-light stress on sucrose and starch concentration in ear leaf and grain of summer maize. (B) Effects of low-light stress on the ratio of sucrose and starch in ear leaf and grain of summer maize. S: Shading from flowering to maturity stage; CK: Normal light from flowering to maturity stage. Different lowercase letters in the same column indicate significant difference at  $P < 0.05$  by LSD test.

Figure 9. Effects of low-light stress on sucrose-starch metabolic enzyme activities in leaves and grains of summer maize. (A) Effects of low-light stress on SPS activities in leaves of summer maize. (B) Effects of low-light stress on AGPase activities in leaves of summer maize. (C) Effects of low-light stress on Rubisco activities in leaves of summer maize. (D) Effects of low-light stress on PEPC activities in leaves of summer maize. (E) Effects of low-light stress on NADP-ME activities in leaves of summer maize. (F) Effects of low-light stress on fructose content in grains of summer maize. (G) Effects of low-light stress on SUS activities in grains of summer maize. (H) Effects of low-light stress on AGPase activities in grains of summer maize. (I) Effects of low-light stress on CWI activities in grains of summer maize. SPS: Sucrose phosphate synthase; AGPase: Adenosine diphosphate glucose pyrophosphorylase; Rubisco: Ribulose-1,5-bisphosphate carboxylase/oxygenase; PEPC: Phosphoenolpyruvate carboxylase; NADP-ME: NADP-dependent malic enzyme; SUS: Sucrose synthase; CWI: Cell wall invertase; S: Shading from flowering to maturity stage; CK: Normal light from flowering to maturity stage. Different lowercase letters in the same column indicate significant difference at  $P < 0.05$  by LSD test.

Figure 10. Effects of low-light stress on sucrose transport efficiency of summer maize. TPT: Triose phosphate/phosphate translocator; SPS: Sucrose phosphatase; CWI: Cell wall invertase; SUS: Sucrose synthase; AGPase: Adenosine diphosphate glucose pyrophosphorylase.

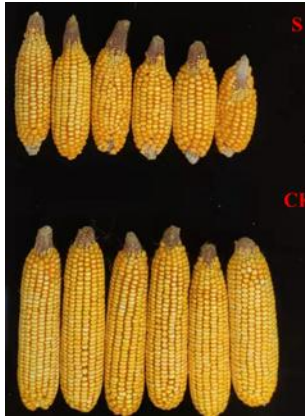

| Treatment | T <sub>max</sub> (d) | W <sub>max</sub> (g) | G <sub>max</sub><br>(g 100kernel <sup>-1</sup> d <sup>-1</sup> ) | G <sub>mean</sub><br>(g 100kernel <sup>-1</sup> d <sup>-1</sup> ) | D (d)  | R    |
|-----------|----------------------|----------------------|------------------------------------------------------------------|-------------------------------------------------------------------|--------|------|
| CK        | 6.13a                | 0.92a                | 15.11a                                                           | 74.61a                                                            | 35.28a | 0.99 |
| S         | 6.56a                | 0.62b                | 10.82b                                                           | 74.57a                                                            | 33.72b | 0.99 |

Figure 1. Effects of low-light stress on the characteristic parameters of grain-filling of summer maize. S: Shading from flowering to maturity stage; CK: Normal light from flowering to maturity stage; T<sub>max</sub>: Days for the maximum grain filling rate; W<sub>max</sub>: Dry matter accumulation under the maximum grain filling rate; G<sub>max</sub>: Maximum grain filling rate; G<sub>mean</sub>: Mean grain filling rate; D: Active grain filling period. Different lowercase letters in the same column indicate significant difference at P < 0.05 by LSD test.

| Year | Growth stage | Treatment | Stalk                             |                | Leaf                              |                | Grain                             |                | Total dry mass (g plant <sup>-1</sup> ) |
|------|--------------|-----------|-----------------------------------|----------------|-----------------------------------|----------------|-----------------------------------|----------------|-----------------------------------------|
|      |              |           | Dry mass (g plant <sup>-1</sup> ) | Proportion (%) | Dry mass (g plant <sup>-1</sup> ) | Proportion (%) | Dry mass (g plant <sup>-1</sup> ) | Proportion (%) |                                         |
| 2020 | VT           | CK        | 87.2                              | 64.9           | 46.9                              | 35.1           |                                   |                | 134.3                                   |
|      |              | R3        | 83.0a                             | 34.3           | 42.7a                             | 17.7           | 97.9a                             | 40.5           | 241.7a                                  |
|      |              | S         | 63.2b                             | 53             | 30.2b                             | 25.3           | 21.5b                             | 17.3           | 120.3b                                  |
|      | R6           | CK        | 112.6a                            | 30.1           | 47.4a                             | 13.3           | 183.5a                            | 50.5           | 340.3a                                  |
|      |              | S         | 62.3b                             | 34.7           | 36.7b                             | 21.9           | 53.6b                             | 38.2           | 165.9b                                  |
| 2021 | VT           | CK        | 70.5                              | 63.8           | 39.9                              | 36.2           |                                   |                | 110.4                                   |
|      |              | R3        | 87.6a                             | 37.6           | 44.1a                             | 18.9           | 78.2a                             | 33.6           | 233.3a                                  |
|      |              | S         | 73.2b                             | 48             | 36.1b                             | 23.7           | 31.4b                             | 20.6           | 152.3b                                  |
|      | R6           | CK        | 61.7a                             | 25.6           | 33.6a                             | 13.9           | 128.7a                            | 53.4           | 241.0a                                  |
|      |              | S         | 50.1b                             | 32.7           | 28.8b                             | 18.8           | 62.5b                             | 40.8           | 153.3b                                  |

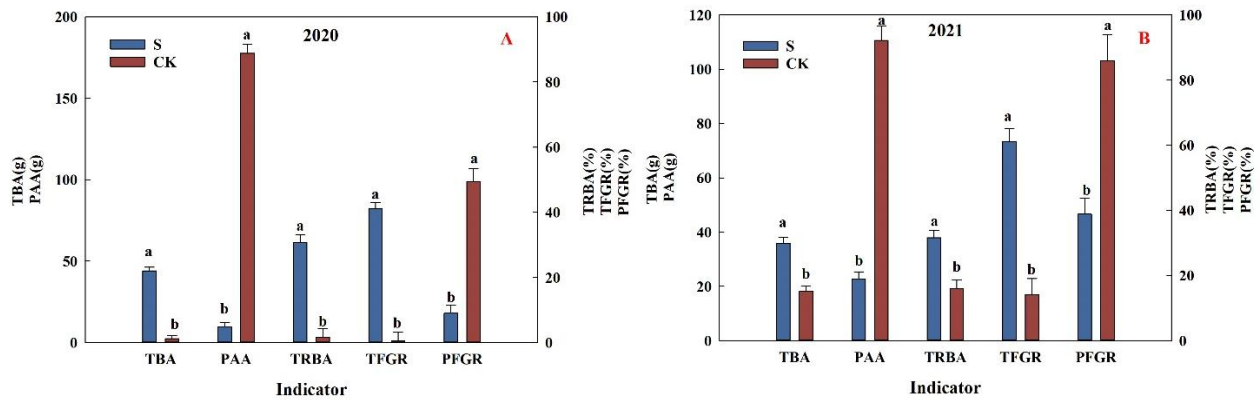

Figure 2. Effects of low-light stress on dry matter accumulation and distribution of summer maize. (A) Effects of low light stress on dry matter accumulation and distribution of summer maize in 2020. (B) Effects of low light stress on dry matter accumulation and distribution of summer maize in 2021. S: Shading from flowering to maturity stage; CK: Normal light from flowering to maturity stage; PAA: The amount of assimilated dry matter after flowering; TBA: Dry matter translocation of pre-flowering; TFGR: Contribution rate of pre-flowering dry matter to grain; TRBA: Dry matter transport rate of pre-flowering; PAGR: Contribution rate of dry matter assimilation to grain after flowering. Different lowercase letters in the same column indicate significant difference at  $P < 0.05$  by LSD test.

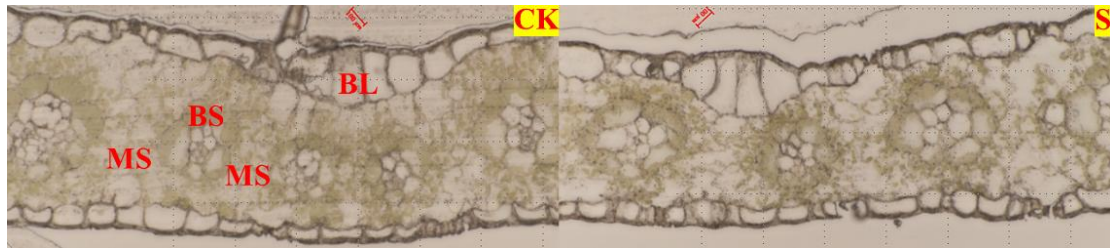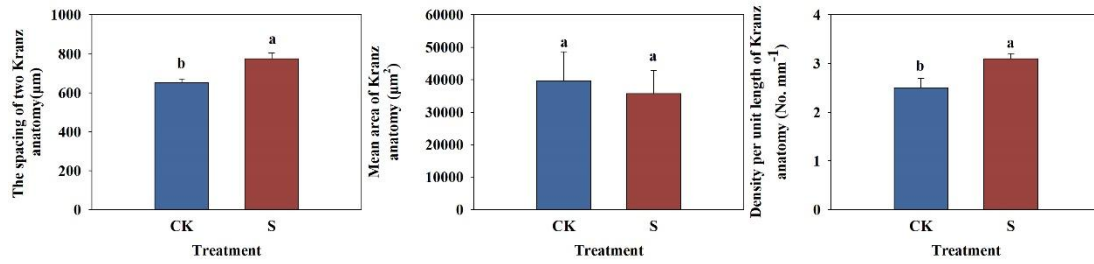

Figure 3. Effects of low-light stress on the number and area of Kranz anatomy in rank-2 intermediate veins of summer maize. S: Shading from flowering to maturity stage; CK: Normal light from flowering to maturity stage. BL: Bulliform cell; MS: Mesophyll cell; BS: Bundle sheath cell. The scale bar is 100 µm. Different lowercase letters in the same column indicate significant difference at  $P < 0.05$  by LSD test.



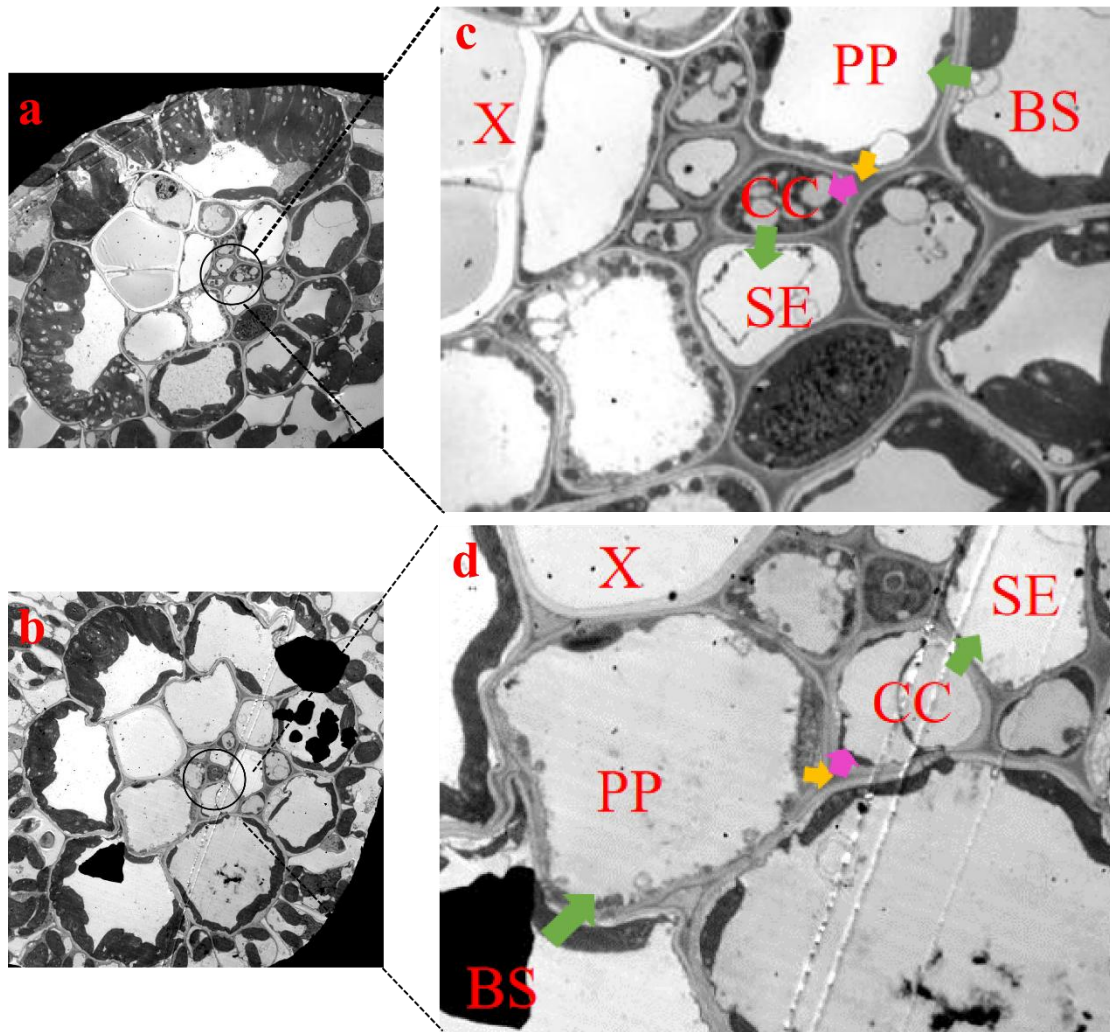

Figure 4. Effects of low-light stress on ultrastructure of summer maize leaves (2500 $\times$ ). a, c: CK; b, d: S. S: Shading from flowering to maturity stage; CK: Normal light from flowering to maturity stage. BS: Bundle sheath cell; PP: Phloem parenchyma cell; CC: Companion cell; SE: Sieve element; X: Xylem.

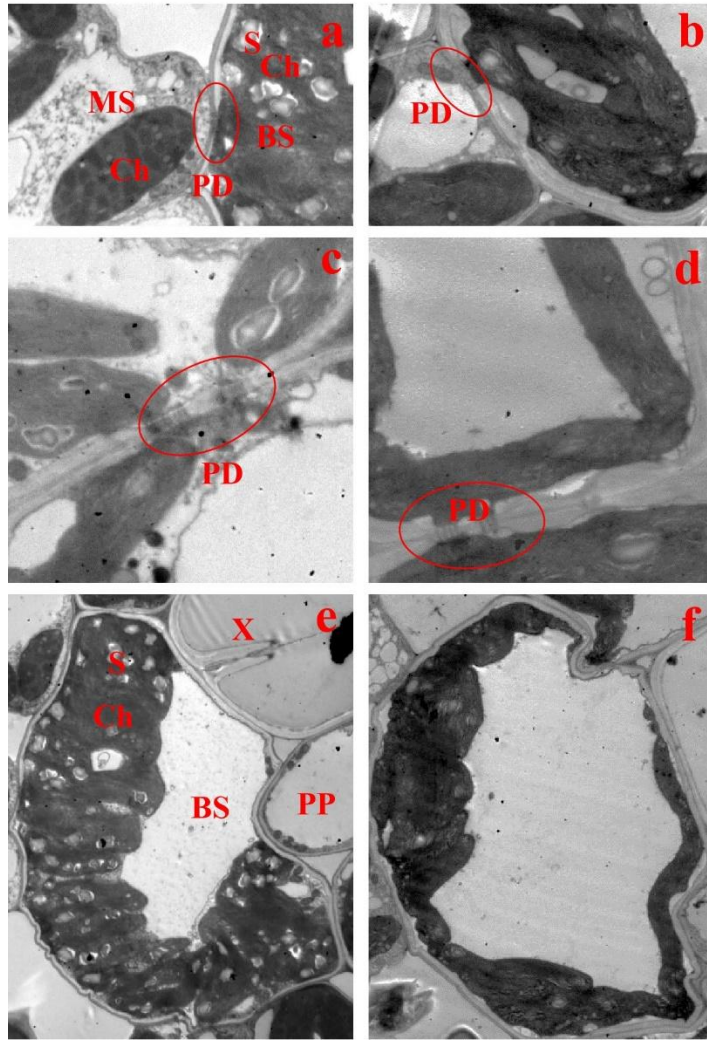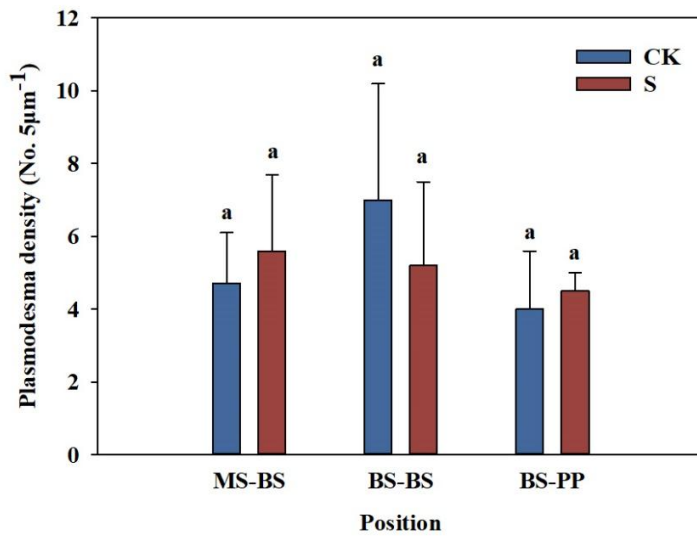

Figure 5. Effects of low-light stress on the number of plasmodesmata in leaves of summer maize. a, c, e: Denotes the plasmodesmata between MS and BS, the plasmodesmata between BS and BS, and the number of starch grains in BS of CK; b, d, f: Denotes the plasmodesmata between MS and BS, the plasmodesmata between BS and BS, and the number of starch grains of S. S: Shading from flowering to maturity stage; CK: Normal light from flowering to maturity stage. BS: Bundle sheath cell; MS:

Mesophyll cell; PD: Plasmodesmata; PP: Phloem parenchyma cell; S: Starch grain; Ch: Chloroplast; X: Xylem. Different lowercase letters in the same column indicate significant difference at  $P < 0.05$  by LSD test.

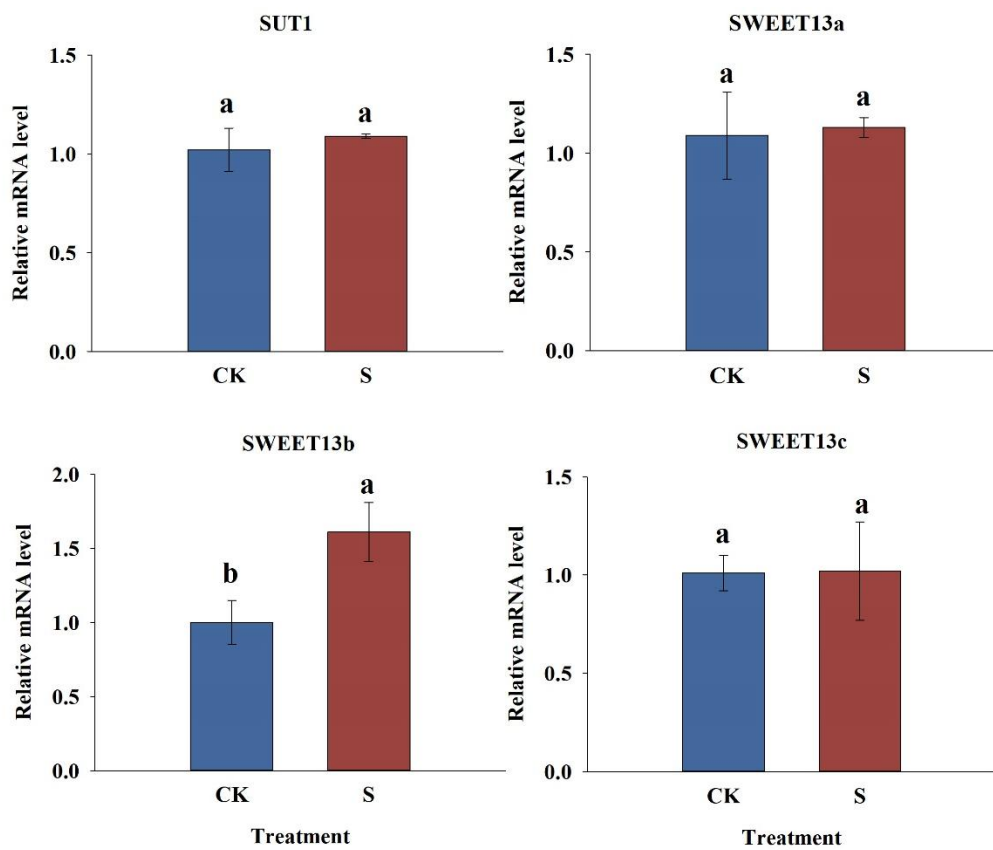

Figure 6. Effects of low-light stress on relative mRNA levels of sucrose transporter in summer maize leaves. S: Shading from flowering to maturity stage; CK: Normal light from flowering to maturity stage. The names of sucrose transporter are indicated at the top. Different lowercase letters in the same column indicate significant difference at  $P < 0.05$  by LSD test.

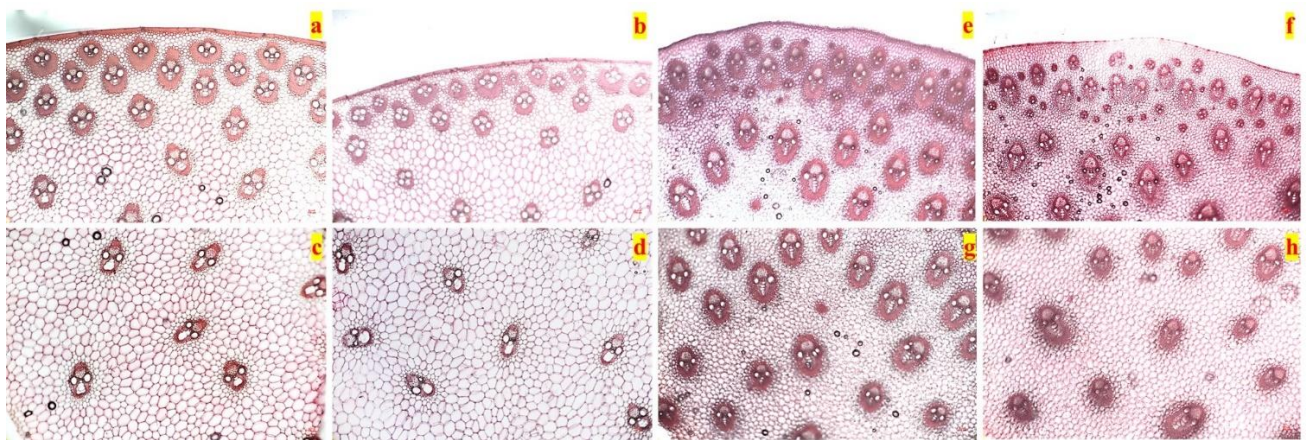

| Watch parts | Treatment | Number of vascular bundles (40×) |                       | Area of big vascular bundle ( $\mu\text{m}^2$ ) |                                |                                 | Area of small vascular bundle ( $\mu\text{m}^2$ ) |
|-------------|-----------|----------------------------------|-----------------------|-------------------------------------------------|--------------------------------|---------------------------------|---------------------------------------------------|
|             |           | Big vascular bundle              | Small vascular bundle | Total area ( $\mu\text{m}^2$ )                  | Xylem area ( $\mu\text{m}^2$ ) | Phloem area ( $\mu\text{m}^2$ ) |                                                   |
| Spike node  | CK        | 8a                               | 21a                   | 116,105a                                        | 29,321a                        | 86,785a                         | 47,018a                                           |
|             | S         | 6a                               | 17b                   | 114,044a                                        | 26,922a                        | 87,122a                         | 31,845b                                           |
| Ear shank   | CK        | 18a                              | 13a                   | 170,851a                                        | 44,487a                        | 126,365a                        | 77,773a                                           |
|             | S         | 17a                              | 13a                   | 125,154b                                        | 39,910b                        | 85,244b                         | 78,514a                                           |

Figure 7. Effects of low-light stress on the structure of small vascular bundle and central vascular bundle of spike node and ear shank in summer maize (40×). a, c: Denotes the structure of small vascular bundle and central vascular bundle of spike node of CK. b, d: Denotes the structure of small vascular bundle and central vascular bundle of spike node of S. e, g: Denotes the structure of small vascular bundle and central vascular bundle of ear shank of CK. f, h: Denotes the structure of small vascular bundle and central vascular bundle of ear shank of S. S: Shading from flowering to maturity stage; CK: Normal light from flowering to maturity stage. Different lowercase letters in the same column indicate significant difference at  $P < 0.05$  by LSD test.

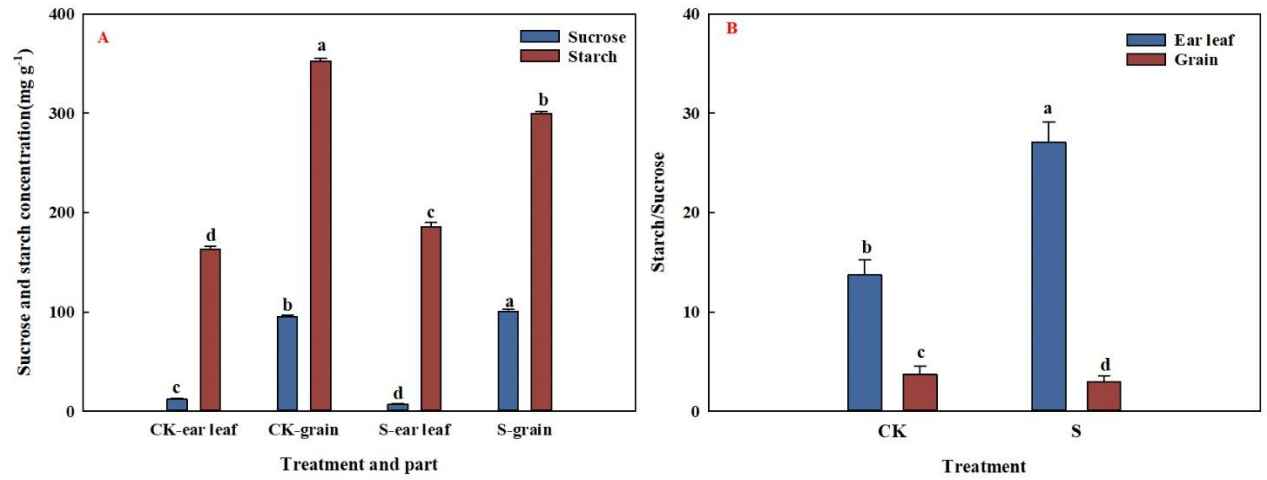

Figure 8. Effects of low-light stress on sucrose and starch contents in ear leaf and grain of summer maize. (A) Effects of low-light stress on sucrose and starch concentration in ear leaf and grain of summer maize. (B) Effects of low-light stress on the ratio of sucrose and starch in ear leaf and grain of summer maize. S: Shading from flowering to maturity stage; CK: Normal light from flowering to maturity stage. Different lowercase letters in the same column indicate significant difference at  $P < 0.05$  by LSD test.

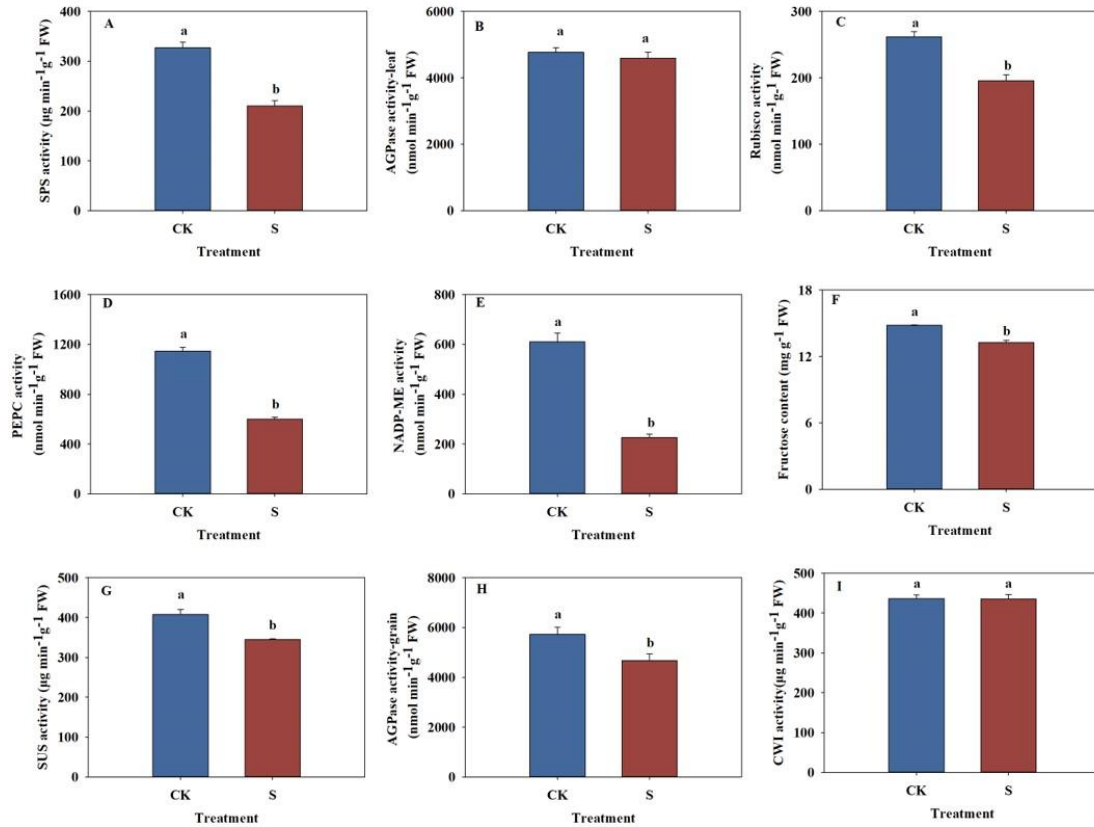

Figure 9. Effects of low-light stress on sucrose-starch metabolic enzyme activities in leaves and grains of summer maize. (A) Effects of low-light stress on SPS activities in leaves of summer maize. (B) Effects of low-light stress on AGPase activities in leaves of summer maize. (C) Effects of low-light stress on Rubisco activities in leaves of summer maize. (D) Effects of low-light stress on PEPC activities in leaves of summer maize. (E) Effects of low-light stress on NADP-ME activities in leaves of summer maize. (F) Effects of low-light stress on fructose content in grains of summer maize. (G) Effects of low-light stress on SUS activities in grains of summer maize. (H) Effects of low-light stress on AGPase activities in grains of summer maize. (I) Effects of low-light stress on CWI activities in grains of summer maize. SPS: Sucrose phosphate synthase; AGPase: Adenosine diphosphate glucose pyrophosphorylase; Rubisco: Ribulose bisphosphate carboxylase oxygenase; PEPC: Phosphoenolpyruvate carboxylase; NADP-ME: NADP-dependent malic enzyme; SUS: Sucrose synthase; CWI: Cell wall invertase; S: Shading from flowering to maturity stage; CK: Normal light from flowering to maturity stage. Different lowercase letters in the same column indicate significant difference at  $P < 0.05$  by LSD test.

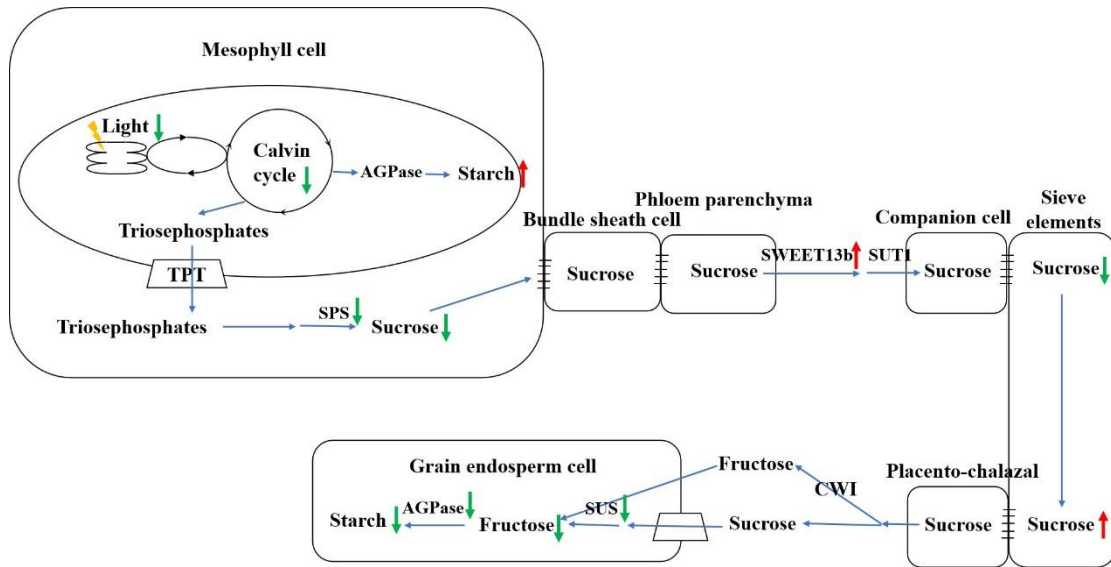

Figure 10. Effects of low-light stress on sucrose transport efficiency of summer maize. TPT: Triose phosphate/phosphate translocator; SPS: Sucrose phosphatase; CWI: Cell wall invertase; SUS: Sucrose synthase; AGPase: Adenosine diphosphate glucose pyrophosphorylase.
